1  
2  
3  
4  
5  
6  
7  
8  
9  
10  
11  
12  
13  
14  
15  
16  
17  
18

**Title: Tracking SARS-CoV-2 Spike Protein Mutations in the United States  
(2020/01 – 2021/03) Using a Statistical Learning Strategy**

**Authors:** Lue Ping Zhao<sup>1\*</sup>, Terry P. Lybrand<sup>2,3</sup>, Peter B. Gilbert<sup>4</sup>, Thomas R. Hawn<sup>5,6</sup>, Joshua T. Schiffer<sup>4,5</sup>, Leonidas Stamatatos<sup>4,6</sup>, Thomas H. Payne<sup>5</sup>, Lindsay N. Carpp<sup>4</sup>, Daniel E. Geraghty<sup>7</sup> and Keith R. Jerome<sup>4</sup>

**Affiliations:**

<sup>1</sup> Public Health Sciences Division, Fred Hutchinson Cancer Research Center; Seattle, WA, USA.

<sup>2</sup> Quintepa Computing LLC; Nashville, TN, USA.

<sup>3</sup> Department of Chemistry; Department of Pharmacology, Vanderbilt University; Nashville, TN, USA.

<sup>4</sup> Vaccine and Infectious Disease Division, Fred Hutchinson Cancer Research Center; Seattle, WA, USA.

<sup>5</sup> Department of Medicine, University of Washington School of Medicine; Seattle, WA, USA.

<sup>6</sup> Department of Global Health, University of Washington; Seattle, WA, USA.

<sup>7</sup> Clinical Research Division, Fred Hutchinson Cancer Research Center, Seattle; WA, USA.

\*Corresponding author. Email: [lzhao@fredhutch.org](mailto:lzhao@fredhutch.org).

20 **Abstract:** The emergence and establishment of SARS-CoV-2 variants of interest (VOI) and  
21 variants of concern (VOC) highlight the importance of genomic surveillance. We propose a  
22 statistical learning strategy (SLS) for identifying and spatiotemporally tracking potentially  
23 relevant Spike protein mutations. We analyzed 167,893 Spike protein sequences from US  
24 COVID-19 cases (excluding 21,391 sequences from VOI/VOC strains) deposited at GISAID  
25 from January 19, 2020 to March 15, 2021. Alignment against the reference Spike protein  
26 sequence led to the identification of viral residue variants (VRVs), i.e., residues harboring a  
27 substitution compared to the reference strain. Next, generalized additive models were applied to  
28 model VRV temporal dynamics, to identify VRVs with significant and substantial dynamics  
29 (false discovery rate q-value  $< 0.01$ ; maximum VRV proportion  $> 10\%$  on at least one day).  
30 Unsupervised learning was then applied to hierarchically organize VRVs by spatiotemporal  
31 patterns and identify VRV-haplotypes. Finally, homology modelling was performed to gain  
32 insight into potential impact of VRVs on Spike protein structure. We identified 90 VRVs, 71 of  
33 which have not previously been observed in a VOI/VOC, and 35 of which have emerged recently  
34 and are durably present. Our analysis identifies 17 VRVs  $\sim 91$  days earlier than their first  
35 corresponding VOI/VOC publication. Unsupervised learning revealed eight VRV-haplotypes of  
36 4 VRVs or more, suggesting two emerging strains (B.1.1.222 and B.1.234). Structural modeling  
37 supported potential functional impact of the D1118H and L452R mutations. The SLS approach  
38 equally monitors all Spike residues over time, independently of existing phylogenetic  
39 classifications, and is complementary to existing genomic surveillance methods.

41 **Main Text:**

42 **INTRODUCTION**

43 Severe Acute Respiratory Syndrome coronavirus 2 (SARS-CoV-2), the pathogen  
44 responsible for the global Covid-19 pandemic, is an RNA virus and thus prone to replication  
45 errors (*1*). Replication errors that yield nonsynonymous amino acid (AA) substitutions, or  
46 nucleotide insertions or deletions that cause a frame shift and alter the subsequent coding  
47 sequence, can lead to a variety of outcomes. If the resulting mutations have detrimental effects  
48 on fitness, or if they have neutral effects on fitness and undergo stochastic extinction, variants  
49 harboring these mutations fail to become established in the population. However, mutations that  
50 confer a fitness advantage can rapidly become dominant in a population. For SARS-CoV-2,  
51 there are three classes of variant: Variant of Interest (VOI), Variant of Concern (VOC), and  
52 Variant of High Consequence (VOHC). The CDC is currently monitoring and characterizing 8  
53 VOIs (B.1.526, B.1.526.1, B.1.525, P.2, B.1.617, B.1.617.1, B.1.617.2, B.1.617.3) and 5 VOCs  
54 (B.1.1.7, P.1, B.1.351, B.1.427, B.1.429) in the United States (*2*). VOCs show specific attributes  
55 such as increased transmissibility (*3-7*), increased resistance to neutralization by antibodies  
56 elicited through natural infection (*3, 8-10*), and/or increased resistance to neutralization by  
57 vaccine-elicited antibodies (*10-12*), and have already influenced vaccine development, evidenced  
58 by the current planning of clinical trials to test variant-adapted vaccines (*13*). While no VOHCs  
59 have yet been identified, it remains possible that such variants – i.e. variants that can effectively  
60 evade natural or vaccine-induced immunity – may yet emerge (*14, 15*). The identification of  
61 VOHCs could necessitate the introduction of more stringent public health guidelines and/or spur  
62 further treatment and vaccine development.

63           Genomic surveillance is critical for tracking the emergence and spread of new variants.  
64   Such surveillance can be accomplished via a variety of approaches, such as phylogenetic analysis  
65   (3, 16). In this approach, new viral sequences are classified to existing lineages identified by  
66   PANGO (17), subsets of samples with the same branches are identified, and variant frequencies  
67   are counted to identify new variants. The NextStrain methodology (18) can model dynamic  
68   changes of variant proportions, while an alternative approach aligns sequence data to a matrix of  
69   binary indicators for the presence of variants, and systematically evaluates each mutant as a  
70   potential variant (19). Leveraging the analytic approach of single nucleotide polymorphisms  
71   (SNPs), variants have been identified by assessing linkage-disequilibrium (20) or similar SNP-  
72   based identification and analysis (21). However, with the exception of the NextStrain  
73   methodology (3), these methods do not directly take into account sequence collection time, nor  
74   explicitly incorporate highly granular geographic information. Moreover, these methods take a  
75   holistic view of the viral genome. Thus, there is a need for complementary approaches for  
76   detecting and characterizing Spike mutations of potential public health importance that may be  
77   missed, or detected later, by existing genomic surveillance methods.

78   To meet this need, we describe a statistical learning strategy (SLS) using generalized additive  
79   models, unsupervised learning techniques, and single nucleotide polymorphism (SNP)  
80   methodologies for identifying and spatiotemporally characterizing viral residue variants (VRVs),  
81   a term we use to describe AA positions in the Spike protein where a mutation is significantly  
82   present in a given geographic area. The SLS method generates pertinent statistics for  
83   reproducible scientific inference and facilitates visual representation of results for intuitive  
84   interpretation. Using publicly available SARS-CoV-2 sequences from US COVID-19 cases that  
85   were not assigned to a VOI or VOC lineage, we apply our method to identify and

86 spatiotemporally characterize, within individual US states/territories, VRVs in the Spike protein.  
87 We also apply standard homology modeling methods to highlight individual AA mutations with  
88 the potential to impact Spike protein structure and/or function.

## 89 **RESULTS**

### 90 **Ab Initio Discovery of VRVs**

91 We first applied the SLS method to identify VRVs separately in each state/territory (Fig. S1).  
92 The decision to compartmentalize VRV discovery by state/territory was partially based on the  
93 fact that domestic travel restrictions have varied over the course of the pandemic, with nearly  
94 half of all states having imposed some type of interstate travel restriction (22), leading to the  
95 hypothesis that VRVs may follow state/territory-specific temporal dynamics. The identified  
96 VRVs showed a range of dynamic patterns across the different states/territories (Fig. S2),  
97 exemplified by the five different trajectories taken by the V382, L452, T478, P681, and T732  
98 VRVs in California (Fig. 1A). The relative abundance of V382 started rising on day 250,  
99 exceeded 10% on day 259, and fell below 10% on day 275. L452 emerged on day 310, exceeded  
100 10% on day 390, and exhibited a positive trajectory thereafter. Three other VRVs (T478, P681,  
101 T732) had similar trajectories to L452.

A

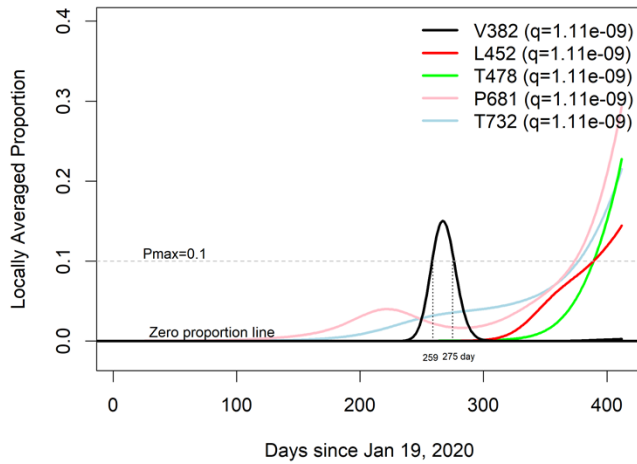

B

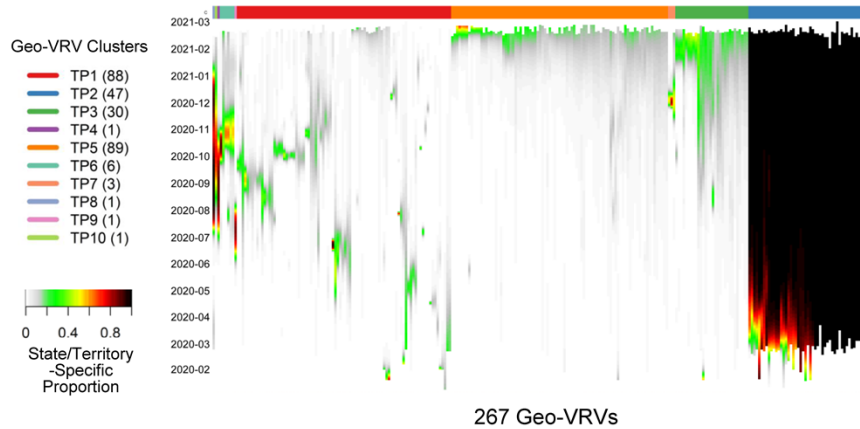

C

AA-Subs in VOIs AA-Subs in VOCs

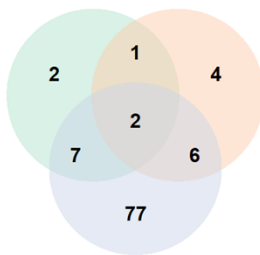

VRVs

D

AA-Subs in VOIs AA-Subs in VOCs

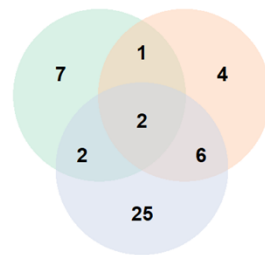

Pressing VRVs

103

104 **Fig. 1. Viral Residue Variant (VRV) spatiotemporal patterns in the United States. (A)**

105 Locally averaged proportions over time of five VRVs (V382, L452, T478, P681 and

106 T732), modeled using sequences from California. The horizontal gray dotted line denotes

107 the Pmax cutoff of 10%. V382 exceeded the Pmax cutoff of 10% on day 259, and  
108 dropped below the Pmax cutoff of 10% on day 275 (marked by the vertical gray lines).  
109 **(B)** Heatmap of the 267 identified geo-VRVs, with color designating the state/territory-  
110 specific VRV proportion at the sampling time as designated on the left-hand vertical axis.  
111 Geo-VRVs with similar temporal dynamics are grouped into 10 clusters (TP1 through  
112 TP10), as designated by the color bar at the top of the heatmap. **(C, D)** Venn diagrams  
113 showing the relationships between AA-substitutions in VOIs, AA-substitutions in VOCs, and **(C)** VRVs  
114 or **(D)** pressing VRVs. AA-substitutions, amino acid positions that have been shown to harbor  
115 substitutions within US-circulating variants; VOCs, variants of concern; VOIs, variants  
116 of interest.

117

118 We refer to the combination of a VRV and a state/territory in which it was identified as a “geo-  
119 VRV”. A total of 267 geo-VRVs, consisting of combinations of 90 VRVs identified among the  
120 52 state/territory classifications, were identified (Table S3). Fifty-eight VRVs were only  
121 observed in one state/territory, whereas 32 were observed in two or more (Table S4).

122 Unsupervised learning was next applied to organize the 267 geo-VRVs into 10 clusters  
123 (TP1 through TP10) (Fig. 1B, Table S3). The cluster most strikingly different from the others  
124 was “TP2”, which was composed of 47 geo-VRVs, each of which contained the D614 VRV at a  
125 maximum relative abundance of 100%, showing the early dominance of the D614 VRV in these  
126 states/territories. Clusters TP3, and TP5 include geo-VRVs of potential concern, since they  
127 include VRVs that appear to have emerged within the last few months in their specific  
128 states/territories. In contrast, most VRVs in the remaining clusters tended to expand and contract  
129 within relatively short times in a given state/territory, making such VRVs likely less important

130 from a public health perspective. We termed these 35 VRVs that were uniquely identified in  
131 Clusters TP2, TP3, and TP5 “pressing VRVs”.

### 132 **Comparison with AA Positions where Substitutions Have Been Identified Within US-** 133 **Circulating VOIs and VOCs**

134 We next compared the 90 VRVs and the 35 pressing VRVs with the 12 and 13 AA positions that  
135 have been shown to harbor substitutions (AA-subs) within US-circulating VOIs and VOCs,  
136 respectively (2). The 90 VRVs included 9 and 8 AA-subs in VOIs and VOCs, respectively; the  
137 35 pressing VRVs included 4 and 8 AA-subs in VOIs and VOCs, respectively (Fig. 1C), even  
138 though all VOI/VOC sequences were excluded from the current analysis. Notably, 25 of the  
139 VRVs that have not been previously identified as an AA-sub in a VOI or VOC appear to have  
140 emerging trajectories, demonstrating the potential of the SLS method to identify novel Spike AA  
141 positions that may warrant further investigation/observation.

142 Five VOI/VOC AA-subs (Y144, F888, V1176, H69, K417) were not identified as a  
143 VRV. Fig. S3 shows the state/territory-specific relative abundances over time for  
144 states/territories where substitutions were identified at these 5 positions (albeit without meeting  
145 the statistical significance criteria for identification as a VRV). Our data suggest that,  
146 individually, these AA positions may be of less interest in US.

### 147 **Timely Detection of Emerging VRVs**

148 Timely detection of potentially fast-emerging VRVs, and conversely, identification of VRVs  
149 likely not of concern, are both important for informing public health guidelines and for  
150 influencing research priorities. Given the importance of timely detection, we use the first time  
151 when a Pmax of a VRV exceeds 10% as the first reportable time. For each out of the set of AA-  
152 subs within VOIs/VOCs that were also identified as VRVs, Table 1 compares within each



153 state/territory the time of detecting an emerging VRV as calculated by the SLS method vs. the  
154 first appearance of the AA-sub in the scientific literature. The SLS identified emerging VRVs in  
155 an average of 207 days, vs 299 days (average of reported values in literature). E484, an AA-sub  
156 in the B.1.1.7, P.1, and B.1.351 variants, is an exception as it was not detectable in the US until  
157 day 370, when it was first detected as a VRV in Rhode Island.

### 158 **VRV-Haplotypes**

159 SARS-CoV-2 is a single-stranded (“haploid”) RNA virus. The presence of multiple VRVs found  
160 in a patient form a VRV-haplotype. The accumulation of multiple VRVs on a single RNA strand  
161 could affect protein function more than a single VRV. To identify VRV-haplotypes, we  
162 performed unsupervised learning of selected VRVs and cases through a two-way hierarchical  
163 cluster analysis state/territory-by-state/territory. As shown in Fig. S4, some VRV-haplotypes are  
164 shared across states/territories, but most are not. Fig. 2, for example, shows the results of the  
165 unsupervised case and VRV clustering for Washington state. The heatmap shows that multiple  
166 VRVs tend to aggregate among subsets of cases, inspection of which can reveal VRV-haplotypes  
167 as follows: The case cluster “PG8”, which includes 14 cases, has VRVs from the “RG4” and  
168 “RG5” clusters, which include the VRVs (S13-W152-L452-V483-N501-D614-A684) (See Table  
169 S5).

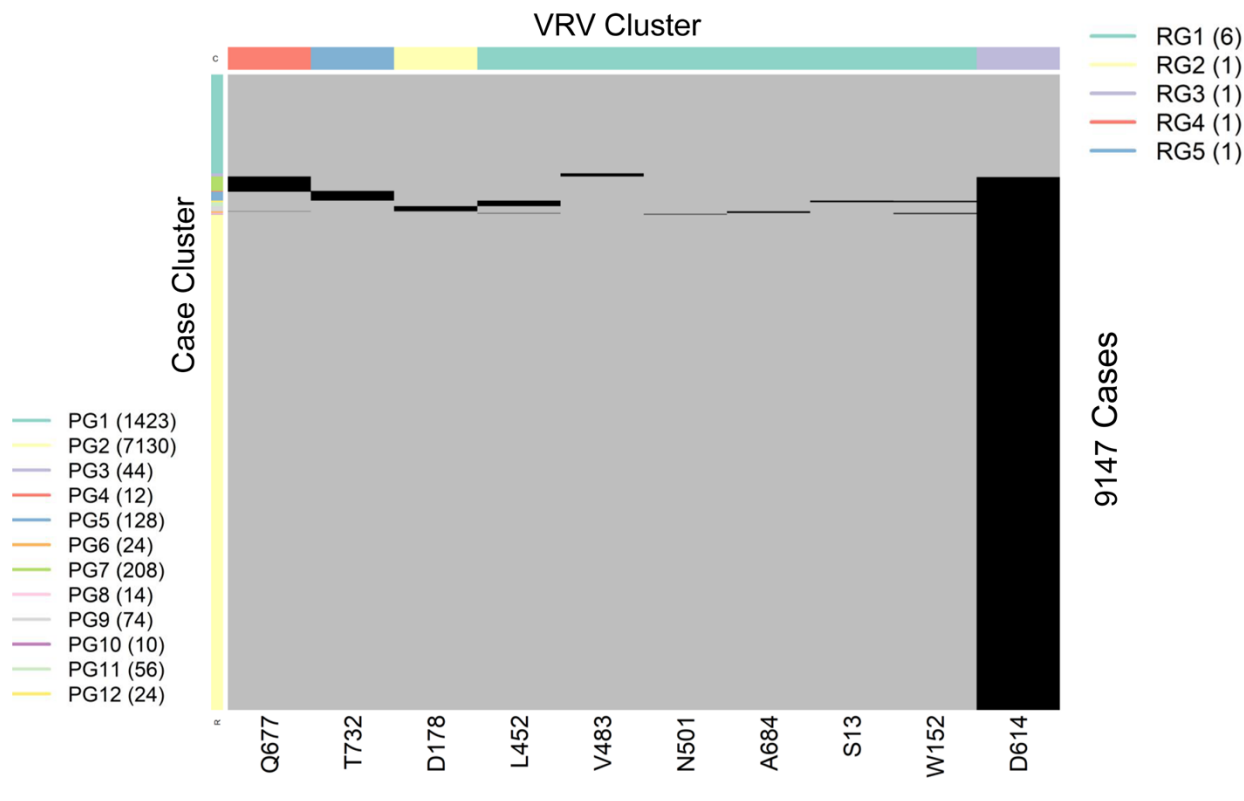

170

171

172 **Fig. 2. Heatmap showing the presence of 10 selected VRVs among 9147 cases in**

173 **Washington state.** Unsupervised learning was used to organize the 10 VRVs into 5  
 174 residue groups (RG1 through RG5) and to organize the 9877 cases into 12 patient groups  
 175 (PG1 through PG12).

176

177

178 Collectively, these four case clusters were combined to identify the VRV-haplotype W1 (Table  
 179 2), found in 104 cases in Washington. Similarly, the case cluster “PG4” (12 cases) had three  
 180 VRVs (D614, Q677, T732) from the “RG3”, “RG4”, and “RG5” clusters. In total, six VRV-  
 181 haplotypes (W1 through W6) were identified in Washington, while the “W6” cluster (7130  
 182 cases) carried only a single VRV, D614 (Table 2). Comparison across VRV-haplotypes

183 suggested that W6 evolved to W3, W4, and W5 via the acquisition of an additional mutation at  
184 T732, Q677, and D178, respectively. Similarly, both W3 and W4 could have evolved to W2 via  
185 the acquisition of an additional mutation at Q677 or T732, respectively.

186 VRV-haplotype blocks are identified from unsupervised learning. Within each block,  
187 there can be multiple VRV-haplotypes that consist of polymorphic residues; individual VRVs  
188 may take either the reference residue or a substitution. For example, VRV-haplotype W1 had 10  
189 haplotypes (Table 2), where the number after the hyphen indicates the number of substitutions.  
190 For example, the haplotype “ICRVNGA” has four substitutions, and was observed twenty times  
191 in Washington.

192 Table 2 also displays the VRV-haplotypes observed in New York (N1 through N7). The  
193 most frequent block, N2, has seven VRVs and 16 unique haplotypes. Block N1 only differs from  
194 Block N2 via the acquisition of the P681 VRV, and thus the two blocks are closely connected.  
195 Similarly, Block N4, which probably gave rise to Block N3, has 14 unique haplotypes, including  
196 “GSRGNH” (six substitutions), which was observed 455 times. Lastly, N5 probably arose from  
197 N6 via N7, and has the “PGHI” haplotype (observed 367 times). We next used unsupervised  
198 learning to construct haplotypes in Washington and New York of the 35 pressing VRVs (Table  
199 S6).

### 200 **Naming VRV Haplotypes via PANGO Lineages**

201 As all sequences corresponding to VOI/VOC were excluded, the strains with detected VRVs are  
202 not currently undergoing special monitoring or characterization. We were thus interested in  
203 naming identified VRV-haplotypes and the PANGO lineages assigned by GISAID. To this end,  
204 we selected VRV-haplotype blocks including 4 or more pressing VRV mutations, resulting in 8  
205 VRV-haplotype blocks. Table 3 cross-tabulates these VRV-haplotypes by their assigned

206 lineages. Of particular interest, viruses with the haplotype “KGHA” of T478-D614-P681-T732  
207 were observed 2132 times, and 2029 of them were assigned to the strain B.1.1.222. It is natural  
208 to name the haplotype T478K-D614G-P681H-T732A as a B.1.1.222. Another noteworthy strain  
209 is B.1.234, which corresponds to “SVGHF” and “SVGHS” of G142-E180-D614-Q677-S940  
210 with exceptionally high frequencies (353 and 262). The remaining VRV-haplotypes mostly  
211 correspond to B.1. Fourteen other strains were found in more than 10 occurrences and may also  
212 be of potential interest.

### 213 **Impact of VRV Haplotypes on Viral Structure**

214 The SLS method includes homology modeling of Spike mutations, to predict possible  
215 consequences on Spike structure/function and to guide laboratory research. Inspection of the  
216 temporal dynamics of the VRV-haplotypes may be useful for identifying VRVs of interest. We  
217 performed homology modeling on two potentially interesting VRV-haplotypes, W1 (N501-  
218 A570-D614-P681-T716-S982-D1118, from the UK variant cluster B.1.1.7) and W2 [S13-W152-  
219 L452-D614, from the US variant cluster (B.1.94; B.1.427; B.1.429)].

220 The D614G mutation observed in the W1 haplotype has been associated with increased  
221 infectivity/transmissibility (23-25). Cryo-electron microscopy structures have been reported  
222 recently (26, 27) that reveal the structural consequences of this mutation and provide a plausible  
223 mechanistic explanation for the increased infectivity of D614G-carrying variants. The D614  
224 VRV has predominated in all US cases for which sequence information is available in the TP2  
225 cluster (Fig. 1B, Table S2). The N501Y mutation (present in the B.1.1.7 variant) is located in the  
226 receptor-binding domain (RBD) and has been reported to enhance binding affinity to the  
227 angiotensin-converting enzyme-2 (10, 28). N501Y has also been shown to reduce susceptibility

228 to some nAbs, although the B.1.1.7 variant appears to remain susceptible to some extent to  
229 natural infection-acquired and vaccine-induced nAbs (10).

230 Of the five remaining VRVs in the W1 haplotype, A570, T716, and S982 seem relatively  
231 benign in that mutations at these positions are already decreasing in certain states/territories (this  
232 trend is also true to some extent for N501Y). While this observation may simply reflect  
233 inadequate sequencing efforts in recent months, it may also indicate that mutations at these  
234 positions do not confer any fitness advantage to the virus.

235 The two remaining VRVs in the W1 haplotype, P681 and D1118, are more intriguing.  
236 Mutations at these two sites, particularly at P681, appear to persist in multiple states/territories.  
237 The P681H mutation occurs in the S1/S2 cleavage segment of the Spike protein, which is  
238 typically not resolved in cryo-electron microscopy or x-ray diffraction experiments. Thus, we  
239 cannot speculate on potential structural consequences of this mutation. However, the continued  
240 presence of this mutation in many states and its location in the Spike protein S1/S2 cleavage  
241 segment suggest that it may warrant further investigation. We are not aware of any reports that  
242 D1118H impacts transmissibility or morbidity, but the location of this mutation in the Spike  
243 protein trimer assembly (Fig. 3A, B) suggests it could impact trimer assembly  
244 structure/stability/dynamics.

245

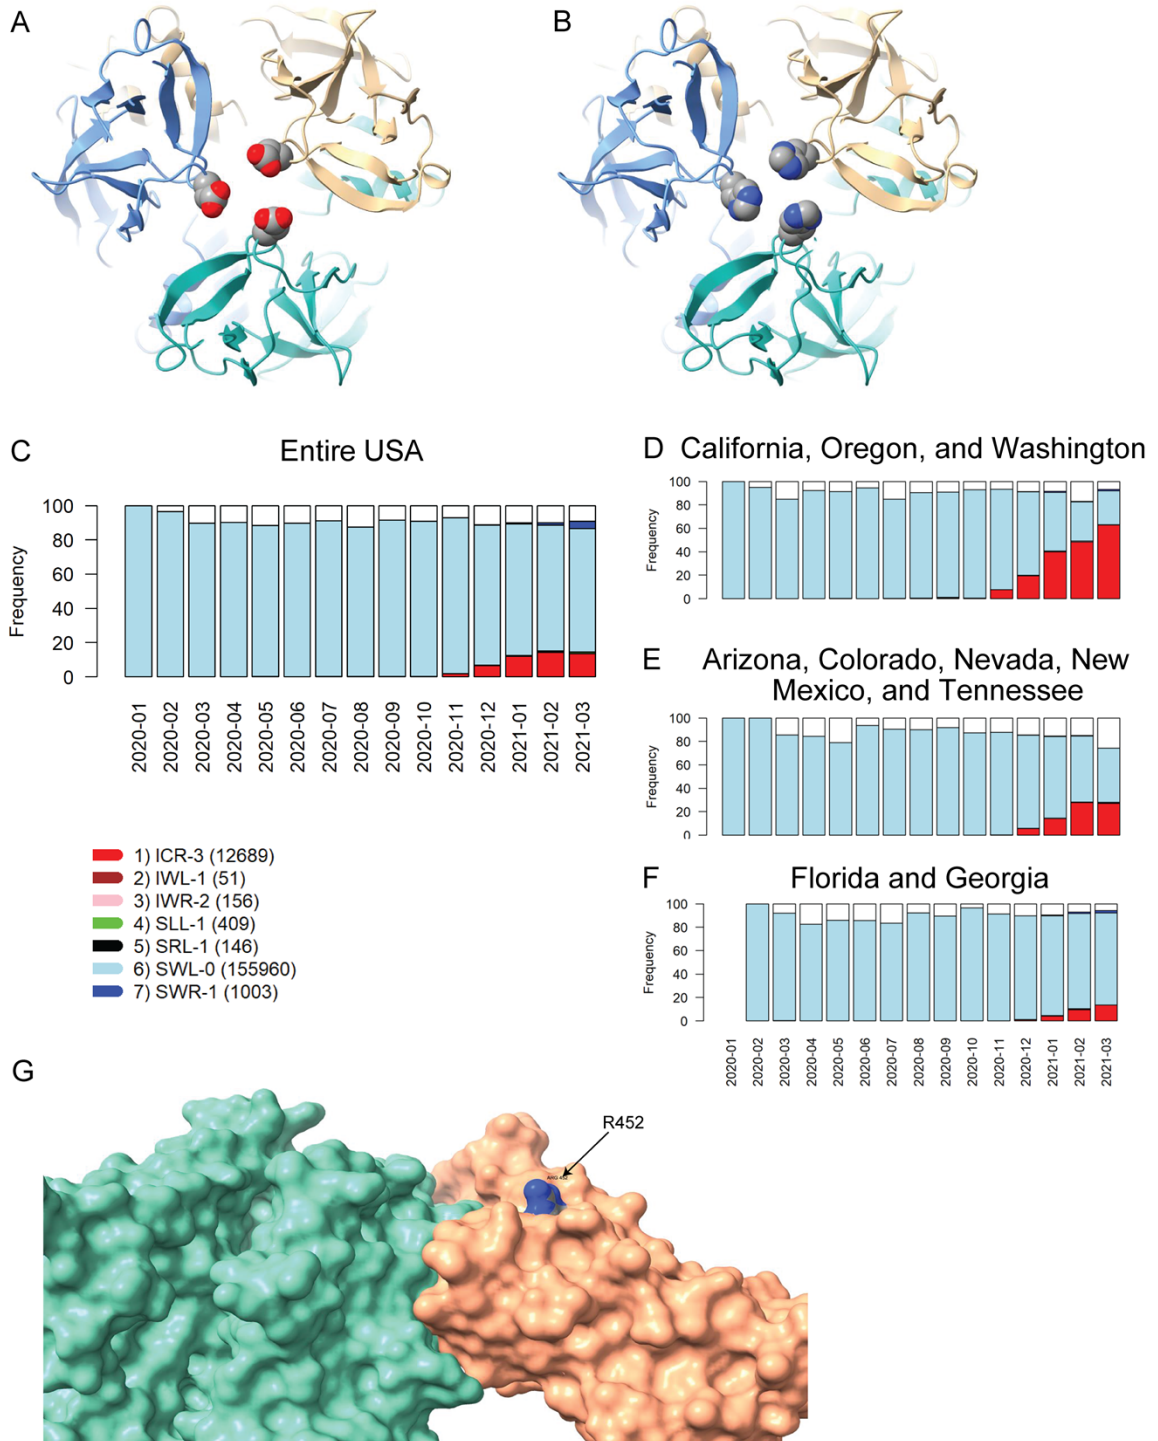

246

247

248

249

250 **Fig. 3. Homology modeling of Spike mutations and haplotypic polymorphisms over time of**  
251 **the S13-W152-L452 VRV-haplotype. (A, B)** Modeled structure of the Spike protein  
252 trimer with (A) D1118 or (B) H1118 (homology-modelled using PDB entry 7KRS as the  
253 template structure). Spike protein monomers are displayed in blue, salmon, and  
254 aquamarine; aspartic acid and histidine residues are rendered as CPK images. (C – F)  
255 Frequencies over time for seven commonly observed haplotypic polymorphisms of the  
256 S13-W152-L452 VRV-haplotype, out of its polymorphisms in the US. Only haplotypic  
257 polymorphisms with at least 50 observations are included. Nomenclature is as follows:  
258 The first three letters designate the amino acids present at positions 13, 152, and 452,  
259 respectively; the number after the hyphen designates the number of amino acids at these  
260 three positions that do not match their reference strain equivalents. Numbers of sequences  
261 harboring each S13-W152-L452 haplotypic polymorphism (across the entire USA) are  
262 shown in parentheses. Frequencies of seven common S13-W152-L452 VRV-haplotypic  
263 polymorphisms (C) in the entire US; (D) in California, Oregon, and Washington  
264 combined; (E) in Arizona, Colorado, Nevada, New Mexico, and Tennessee combined;  
265 and (F) in Florida and Georgia combined. (G) Homology-modeled complex of the  
266 receptor-binding domain of the Spike protein (salmon), harboring the L452R mutation,  
267 bound to the angiotensin-converting enzyme 2 (ACE2) receptor (aquamarine). Within the  
268 R452 residue, nitrogen atoms are shown in blue and carbon atoms are shown in grey.  
269  
270  
271 The US variants also carry the D614G mutation. The VRV-haplotype S13I-W152C-  
272 L452R (ICR-3) appeared in Fall 2020 and is rapidly becoming dominant in states on the West

273 Coast, as well as appearing in selected Southwestern and Southeastern states (Fig. 3C-3F). The  
274 S13I and W152C mutations, which are situated in the N-terminal domain (NTD) of the Spike  
275 protein, have been implicated in escape from NTD-targeting monoclonal antibodies (29). The  
276 L452R mutation is situated in the RBD; homology modelling of the RBD-ACE2 complex shows  
277 that while R452 does not directly contact ACE2, the guanidinium side chain of R452 is surface-  
278 exposed and thus could potentially impact nAb binding (Fig. 3G). The L452R mutation was  
279 recently shown to reduce binding affinity to some RBD-targeting monoclonal antibodies, as well  
280 as to reduce susceptibility to nAbs (29). Thus, structural modeling of mutations in the S13-  
281 W152-L452 VRV-haplotype yields results consistent with the temporal dynamics of this VRV-  
282 haplotype.

## 283 **DISCUSSION**

284 The continuous evolution of SARS-CoV-2 has already impacted public health guidelines  
285 and research priorities, with the potential of even more clinically consequential variants still to  
286 emerge. Here we leveraged a public data resource and described a statistical learning strategy for  
287 analyzing large, complex SARS-CoV-2 sequence datasets while incorporating temporal and  
288 spatial information. We provide detailed information on the emergence and persistence (or  
289 disappearance) of specific mutations in US states/territories, helping identify mutations that may  
290 warrant further observation/investigation. Our approach can be applied to other pathogens for  
291 which sufficient genomic surveillance data are available, generating important, statistically  
292 rigorous, and visually interpretable information for the biomedical research community,  
293 clinicians and public health officials. Our approach can also provide insight on the evolution of  
294 mutants and linkage with known viral strains.



295 By applying the SLS method to 167,893 US sequences not classified as any VOI/VOC,  
296 we identified 77 novel individual VRVs, including 25 pressing VRVs that appear to have  
297 emerged in the US. Among these pressing VRVs, the haplotype (T478-D614-P681-T732) links  
298 with the strain B.1.1.222 and (G142-E180-D614-Q677-S940) with the strain B.1.234, both of  
299 which do not correspond to any current VOI/VOC. Also of note, if the SLS method is applied to  
300 all US sequences, all circulating VOI/VOC are identified (results not shown).

301 As part of the assessment of immune correlates of protection, many randomized, placebo-  
302 controlled COVID-19 vaccine efficacy trials measure Spike protein sequences from symptomatic  
303 COVID-19 endpoint cases, and sometimes also from SARS-CoV-2 asymptomatic infections.  
304 Sieve analysis of these viral sequences can be conducted to assess whether and how vaccine  
305 efficacy depends on Spike protein sequence features, including differential vaccine efficacy  
306 across the levels of VRVs and of VRV-haplotypes (30). The graphical tools proposed here for  
307 spatiotemporal tracking of VRVs and VRV-haplotypes can be useful for sieve analysis, first by  
308 helping define and communicate the set of VRVs and VRV-haplotypes of study endpoint cases  
309 that have sufficient variability to be able to assess whether vaccine efficacy depends on the  
310 feature. For example, given that most vaccines use the Wuhan strain as the vaccine-insert, VRVs  
311 that meet our  $P_{max} > 0.10$  criterion would readily have the level of variability required for sieve  
312 analysis, whereas VRVs with  $P_{max} < 0.02$  would likely not. Secondly, including assignment to  
313 vaccine or placebo as a factor in the unsupervised clustering graphics applied to the vaccine  
314 efficacy trial sequence data sets may help communicate results of sieve analysis. Third, many of  
315 the vaccine efficacy trials have been offering the vaccine to placebo recipients, such that the  
316 placebo arm is lost and long term follow-up occurs only in individuals originally vaccinated or  
317 newly (deferred) vaccinated (31). The graphical tools may be applied to track study participant

318 vaccine breakthrough virus VRVs and VRV haplotypes over time, and to similarly track VRVs  
319 and VRV haplotypes in GISAID data bases of unvaccinated persons matched by geography and  
320 time, and a comparison of these two tracking results may aid sieve analysis during the long term  
321 follow-up period of the vaccine efficacy trials.

322 Evidence is mounting that neutralizing antibodies acquired by natural infection (32, 33)  
323 or through vaccination (34, 35) are a correlate of protection against COVID-19. Therefore, it will  
324 be critical to assess whether and how VRVs and/or VRV-haplotypes in the infecting strains  
325 impact neutralizing antibody titers attained by natural infection (36), as well as whether and how  
326 they impact neutralization sensitivity to vaccine-induced neutralizing antibodies (12) and/or  
327 monoclonal antibodies (37). One possibility is that the graphical tools used here could annotate  
328 VRVs and VRV-haplotypes according to impact on neutralization. Moreover, a subset of sieve  
329 analyses is designed to restrict to VRVs and VRV-haplotypes that are known to impact  
330 neutralization response to the given vaccine under study, to improve power and to contribute to  
331 understanding neutralizing antibody-based correlates of protection. Applications of pinpointing  
332 VRVs or VRV-haplotypes that impact vaccine efficacy, and to quantify their impact, include  
333 informing models for predicting vaccine efficacy against circulating virus populations, and to aid  
334 optimization of vaccine strain selection.

335 A limitation of our approach is that it is constrained by intrinsic sampling limitations,  
336 since all sequences were collected and contributed by laboratories without consistent sampling  
337 protocols. Hence, despite the large size of our dataset, the analyzed sequences were not  
338 nationally representative. Further, it is important to interpret our results in terms of VRV  
339 proportions among reported sequence data, rather than incidences or prevalence of VRVs, in the  
340 absence of reliably estimated denominators. To overcome this limitation, public health agencies

341 need to consider a uniformly developed surveillance protocol, to sequence COVID-19 cases  
342 from well-defined populations.

## 343 **MATERIALS AND METHODS**

### 344 **Spike AA Sequences**

345 Spike AA sequences (genome position: 21563-25384) from 189,727 COVID-19 cases in  
346 the US and selected US territories, along with their associated metadata, were retrieved from  
347 GISAID (38) (<https://www.gisaid.org/>) on March 23, 2021. Geographic origin (one of the 50 US  
348 states, Washington DC, Puerto Rico, or the Virgin Islands) was available for 189,284 of the  
349 sequences. For 443 of the cases, no US state/territory origin information was available. To  
350 ensure adequate sample size, Spike sequences from North Dakota, South Dakota, and the Virgin  
351 Islands were combined with these 443 sequences, forming an “Other States” category (728  
352 sequences). Among them, 21,391 sequences were classified as a VOI or VOC (Table S1). These  
353 sequences were excluded, leaving 167,893 sequences for the analysis (see Table S2 for monthly  
354 case numbers by state/territory).

### 355 **Sequence Alignment and Transformation to VRV Indicators**

356 Spike protein sequences were aligned to the Wuhan reference sequence (39) using  
357 MAFFT (40), yielding a complete “rectangular residue sequence matrix”. Sequences with at least  
358 one AA mutation (compared to the reference) were identified, enabling transformation of the  
359 residue sequence matrix to a matrix of binary VRV (mutant) indicators. Monomorphic residues  
360 led to columns of zeros and were eliminated from further analysis. We use VRV in this work to  
361 refer to a single AA position that harbors a substitution. We reserve the term “variant” in this  
362 work for identified VOIs and VOCs.

## 363 **Statistical Learning Strategy (SLS)**

### 364 ***Modeling VRV Temporal Dynamics***

365 To model non-linear temporal dynamics, a generalized additive model (GAM) was used  
366 to regress the VRV indicator over sample collection time through a non-parametric regression  
367 model. Further details are given in the Supplementary Materials.

### 368 ***Visual Representation of Temporal Dynamics***

369 Within-state/territory: Temporal dynamics of  $<8$  VRVs within a given state/territory were  
370 visualized with a line plot. For visualizing temporal dynamics of  $\geq 8$  VRVs within a given  
371 state/territory, unsupervised learning was applied, grouping VRVs with similar temporal  
372 patterns. Results were visualized with a heatmap.

373 Spatially integrated: To visualize spatiotemporal VRV dynamics, all state-specific  
374 temporal dynamics were integrated and unsupervised learning (one-way hierarchical clustering  
375 with the Euclidean distance with weights in favor of recent temporal trajectories and the  
376 “ward.D2” agglomeration method) (41) was applied.

### 377 ***Missing Residue Imputation***

378 Imputation of missing amino acid information is described in the Supplementary  
379 Material.

### 380 ***VRV-Haplotypes***

381 A viral strain harboring multiple VRVs is referred to as a “VRV-haplotype”. To identify  
382 VRV-haplotypes, unsupervised learning was used to organize both cases and VRVs through a  
383 two-way hierarchical analysis (41). Further information is given in the Supplementary Material.

384 ***Homology Modeling of Selected Haplotype Mutants***

385           After identifying specific Spike protein mutants of interest from VRVs and related VRV-  
386 haplotypes, standard homology modeling methods were applied to generate 3D models. Further  
387 information is given in the Supplementary Material.

389 **Supplementary Material**

390 Materials and Methods

391 Fig. S1. For all Spike residues with sufficient variation, scatterplots of the maximum proportion  
392 (Pmax) of sequences from a given state/territory harboring a mutation at a given amino acid  
393 position vs. q-value. Points in red represent residues that meet both criteria for classification as a  
394 VRV. Points in black represent residues that do not.

395 Fig. S2. Temporal patterns of VRVs identified in each state/territory.

396 Fig. S3. Locally averaged proportions over time for substitutions at 3 AA-subs in a VOI (Y144,  
397 F888, V1176) and at 3 AA-subs in a VOC (H69, Y144, K417) that were not detected by the SLS  
398 method in states/territories where at least three sequences had a substitution at the designated AA  
399 position. AA-sub, amino acid that has been shown to harbor a substitution in a US-circulating  
400 VOI or VOC. VOI, variant of interest; VOC, variant of concern.

401 Fig. S4. Presence of VRVs among all cases in each state/territory. A gray cell means the VRV  
402 was not identified in the given case; a black cell means that it was. Both cases and VRVs were  
403 clustered by two-way hierarchical cluster analysis.

404 Table S1. Distribution of the 21,391 VOI/VOC sequences by specific variant and by  
405 state/territory.

406 Table S2. Distribution of the 167,893 SARS-CoV-2 sequences by state/territory and by GISAID  
407 submission month, along with state/territory-specific distribution of the 21,391 VOI/VOC  
408 sequences that were excluded from the analysis.

409 Table S3. The 10 identified geo-VRV clusters (TP1 through TP10), based on temporal profiles.

410 Table S4. Frequencies of the 90 viral residue variants (VRVs) by state/territory, from an  
411 unsupervised learning from bi-clustering of all States and VRVs.

412 Table S5. VRV-haplotypes identified within each state/territory, along with state/territory-  
413 specific frequencies. The “positivity” column indicates the proportion of mutations in each  
414 haplotype block.

415 Table S6. Identified haplotypes of pressing VRVs in Washington and New York: frequencies,  
416 numbers of VRVs and haplotypic polymorphisms (frequency) in each state.

417

## 418 **References and Notes**

- 419 1. S. Duffy, Why are RNA virus mutation rates so damn high? *PLoS Biol* **16**, e3000003  
420 (2018).
- 421 2. US Centers for Disease Control and Prevention, SARS-CoV-2 Variant Classifications  
422 and Definitions. [https://www.cdc.gov/coronavirus/2019-ncov/cases-updates/variant-](https://www.cdc.gov/coronavirus/2019-ncov/cases-updates/variant-surveillance/variant-info.html)  
423 [surveillance/variant-info.html](https://www.cdc.gov/coronavirus/2019-ncov/cases-updates/variant-surveillance/variant-info.html) Last updated 27 Apr, 2021. Access date 27 Apr, 2021.
- 424 3. X. Deng, M. A. Garcia-Knight, M. M. Khalid, V. Servellita, C. Wang, M. K. Morris, A.  
425 Sotomayor-Gonzalez, D. R. Glasner, K. R. Reyes, A. S. Gliwa, N. P. Reddy, C. Sanchez  
426 San Martin, S. Federman, J. Cheng, J. Balcerek, J. Taylor, J. A. Streithorst, S. Miller, G.  
427 R. Kumar, B. Sreekumar, P. Y. Chen, U. Schulze-Gahmen, T. Y. Taha, J. Hayashi, C. R.  
428 Simoneau, S. McMahon, P. V. Lidsky, Y. Xiao, P. Hemarajata, N. M. Green, A.  
429 Espinosa, C. Kath, M. Haw, J. Bell, J. K. Hacker, C. Hanson, D. A. Wadford, C. Anaya,  
430 D. Ferguson, L. F. Lareau, P. A. Frankino, H. Shivram, S. K. Wyman, M. Ott, R. Andino,  
431 C. Y. Chiu, Transmission, infectivity, and antibody neutralization of an emerging SARS-  
432 CoV-2 variant in California carrying a L452R spike protein mutation. *medRxiv*, (2021).
- 433 4. H. Tegally, E. Wilkinson, M. Giovanetti, A. Iranzadeh, V. Fonseca, J. Giandhari, D.  
434 Doolabh, S. Pillay, E. J. San, N. Msomi, K. Mlisana, A. von Gottberg, S. Walaza, M.

- 435 Allam, A. Ismail, T. Mohale, A. J. Glass, S. Engelbrecht, G. Van Zyl, W. Preiser, F.  
436 Petruccione, A. Sigal, D. Hardie, G. Marais, M. Hsiao, S. Korsman, M.-A. Davies, L.  
437 Tyers, I. Mudau, D. York, C. Maslo, D. Goedhals, S. Abrahams, O. Laguda-Akingba, A.  
438 Alisoltani-Dehkordi, A. Godzik, C. K. Wibmer, B. T. Sewell, J. Lourenço, L. C. J.  
439 Alcantara, S. L. K. Pond, S. Weaver, D. Martin, R. J. Lessells, J. N. Bhiman, C.  
440 Williamson, T. de Oliveira, Emergence and rapid spread of a new severe acute  
441 respiratory syndrome-related coronavirus 2 (SARS-CoV-2) lineage with multiple spike  
442 mutations in South Africa. <https://doi.org/10.1101/2020.12.21.20248640> *medRxiv*,  
443 2020.2012.2021.20248640 (2020).
- 444 5. C. M. Voloch, R. da Silva Francisco, Jr., L. G. P. de Almeida, C. C. Cardoso, O. J.  
445 Brustolini, A. L. Gerber, A. P. C. Guimaraes, D. Mariani, R. M. da Costa, O. C. Ferreira,  
446 Jr., L. W. A. C. C. Covid19-Ufrj Workgroup, T. S. Frauches, C. M. B. de Mello, I. C.  
447 Leitao, R. M. Galliez, D. S. Faffe, T. Castineiras, A. Tanuri, A. T. R. de Vasconcelos,  
448 Genomic characterization of a novel SARS-CoV-2 lineage from Rio de Janeiro, Brazil. *J*  
449 *Virol*, (2021).
- 450 6. E. Volz, S. Mishra, M. Chand, J. C. Barrett, R. Johnson, L. Geidelberg, W. R. Hinsley, D.  
451 J. Laydon, G. Dabrera, Á. O’Toole, R. Amato, M. Ragonnet-Cronin, I. Harrison, B.  
452 Jackson, C. V. Ariani, O. Boyd, N. J. Loman, J. T. McCrone, S. Gonçalves, D. Jorgensen,  
453 R. Myers, V. Hill, D. K. Jackson, K. Gaythorpe, N. Groves, J. Sillitoe, D. P.  
454 Kwiatkowski, S. Flaxman, O. Ratmann, S. Bhatt, S. Hopkins, A. Gandy, A. Rambaut, N.  
455 M. Ferguson, Transmission of SARS-CoV-2 Lineage B.1.1.7 in England: Insights from  
456 linking epidemiological and genetic data. 2020.12.30.20249034; doi:



- 457 <https://doi.org/10.1101/2020.12.30.20249034> *medRxiv*, 2020.2012.2030.20249034  
458 (2021).
- 459 7. E. Volz, S. Mishra, M. Chand, J. C. Barrett, R. Johnson, L. Geidelberg, W. R. Hinsley, D.  
460 J. Laydon, G. Dabrera, A. O'Toole, R. Amato, M. Ragonnet-Cronin, I. Harrison, B.  
461 Jackson, C. V. Ariani, O. Boyd, N. J. Loman, J. T. McCrone, S. Goncalves, D. Jorgensen,  
462 R. Myers, V. Hill, D. K. Jackson, K. Gaythorpe, N. Groves, J. Sillitoe, D. P.  
463 Kwiatkowski, C.-G. U. consortium, S. Flaxman, O. Ratmann, S. Bhatt, S. Hopkins, A.  
464 Gandy, A. Rambaut, N. M. Ferguson, Assessing transmissibility of SARS-CoV-2 lineage  
465 B.1.1.7 in England. *Nature*, (2021).
- 466 8. P. Wang, M. S. Nair, L. Liu, S. Iketani, Y. Luo, Y. Guo, M. Wang, J. Yu, B. Zhang, P. D.  
467 Kwong, B. S. Graham, J. R. Mascola, J. Y. Chang, M. T. Yin, M. Sobieszczyk, C. A.  
468 Kyratsous, L. Shapiro, Z. Sheng, Y. Huang, D. D. Ho, Antibody Resistance of SARS-  
469 CoV-2 Variants B.1.351 and B.1.1.7. <https://doi.org/10.1101/2021.01.25.428137> Access  
470 date 7 Mar, 2021. *bioRxiv*, 2021.2001.2025.428137 (2021).
- 471 9. D. A. Collier, A. De Marco, I. A. T. M. Ferreira, B. Meng, R. Datir, A. C. Walls, S. A.  
472 Kemp S, J. Bassi, D. Pinto, C. S. Fregni, S. Bianchi, M. A. Tortorici, J. Bowen, K. Culap,  
473 S. Jaconi, E. Cameroni, G. Snell, M. S. Pizzuto, A. F. Pellanda, C. Garzoni, A. Riva, A.  
474 Elmer, N. Kingston, B. Graves, L. E. McCoy, K. G. Smith, J. R. Bradley, J. James  
475 Thaventhiran, L. Lourdes Ceron-Gutierrez, G. Barcenas-Morales, H. W. Virgin, A.  
476 Lanzavecchia, L. Piccoli, R. Doffinger, M. Wills, D. Veessler, D. Corti, R. K. Gupta,  
477 SARS-CoV-2 B.1.1.7 escape from mRNA vaccine-elicited neutralizing antibodies.  
478 2021.01.19.21249840; doi: <https://doi.org/10.1101/2021.01.19.21249840> *medRxiv*,  
479 2021.2001.2019.21249840 (2021).

- 480 10. P. Supasa, D. Zhou, W. Dejnirattisai, C. Liu, A. J. Mentzer, H. M. Ginn, Y. Zhao, H. M.  
481 E. Duyvesteyn, R. Nutalai, A. Tuekprakhon, B. Wang, G. C. Paesen, J. Slon-Campos, C.  
482 Lopez-Camacho, B. Hallis, N. Coombes, K. R. Bewley, S. Charlton, T. S. Walter, E.  
483 Barnes, S. J. Dunachie, D. Skelly, S. F. Lumley, N. Baker, I. Shaik, H. E. Humphries, K.  
484 Godwin, N. Gent, A. Sienkiewicz, C. Dold, R. Levin, T. Dong, A. J. Pollard, J. C.  
485 Knight, P. Klenerman, D. Crook, T. Lambe, E. Clutterbuck, S. Bibi, A. Flaxman, M.  
486 Bittaye, S. Belij-Rammerstorfer, S. Gilbert, D. R. Hall, M. A. Williams, N. G. Paterson,  
487 W. James, M. W. Carroll, E. E. Fry, J. Mongkolsapaya, J. Ren, D. I. Stuart, G. R.  
488 Screaton, Reduced neutralization of SARS-CoV-2 B.1.1.7 variant by convalescent and  
489 vaccine sera. *Cell* **184**, 2201-2211 e2207 (2021).
- 490 11. S. A. Madhi, V. Baillie, C. L. Cutland, M. Voysey, A. L. Koen, L. Fairlie, S. D.  
491 Padayachee, K. Dheda, S. L. Barnabas, Q. E. Bhorat, C. Briner, G. Kwatra, K. Ahmed, P.  
492 Aley, S. Bhikha, J. N. Bhiman, A. E. Bhorat, J. du Plessis, A. Esmail, M. Groenewald, E.  
493 Horne, S. H. Hwa, A. Jose, T. Lambe, M. Laubscher, M. Malahleha, M. Masenya, M.  
494 Masilela, S. McKenzie, K. Molapo, A. Moultrie, S. Oelofse, F. Patel, S. Pillay, S. Rhead,  
495 H. Rodel, L. Rossouw, C. Taoushanis, H. Tegally, A. Thombrayil, S. van Eck, C. K.  
496 Wibmer, N. M. Durham, E. J. Kelly, T. L. Villafana, S. Gilbert, A. J. Pollard, T. de  
497 Oliveira, P. L. Moore, A. Sigal, A. Izu, N.-S. G. W.-V. C. Group, Efficacy of the  
498 ChAdOx1 nCoV-19 Covid-19 Vaccine against the B.1.351 Variant. *N Engl J Med*,  
499 (2021).
- 500 12. W. F. Garcia-Beltran, E. C. Lam, K. St Denis, A. D. Nitido, Z. H. Garcia, B. M. Hauser,  
501 J. Feldman, M. N. Pavlovic, D. J. Gregory, M. C. Poznansky, A. Sigal, A. G. Schmidt, A.

- 502 J. Iafrate, V. Naranbhai, A. B. Balazs, Multiple SARS-CoV-2 variants escape  
503 neutralization by vaccine-induced humoral immunity. *Cell*, (2021).
- 504 13. R. Rubin, COVID-19 Vaccines vs Variants-Determining How Much Immunity Is  
505 Enough. *Jama-J Am Med Assoc*, (2021).
- 506 14. D. A. Kennedy, A. F. Read, Monitor for COVID-19 vaccine resistance evolution during  
507 clinical trials. *PLoS Biol* **18**, e3001000 (2020).
- 508 15. D. M. Altmann, R. J. Boyton, R. Beale, Immunity to SARS-CoV-2 variants of concern.  
509 *Science* **371**, 1103-1104 (2021).
- 510 16. D. P. Maison, L. L. Ching, C. M. Shikuma, V. R. Nerurkar, Genetic Characteristics and  
511 Phylogeny of 969-bp S Gene Sequence of SARS-CoV-2 from Hawaii Reveals the  
512 Worldwide Emerging P681H Mutation. *bioRxiv*, (2021).
- 513 17. A. Rambaut, E. C. Holmes, A. O'Toole, V. Hill, J. T. McCrone, C. Ruis, L. du Plessis, O.  
514 G. Pybus, A dynamic nomenclature proposal for SARS-CoV-2 lineages to assist genomic  
515 epidemiology. *Nat Microbiol* **5**, 1403-1407 (2020).
- 516 18. J. Hadfield, C. Megill, S. M. Bell, J. Huddleston, B. Potter, C. Callender, P. Sagulenko,  
517 T. Bedford, R. A. Neher, Nextstrain: real-time tracking of pathogen evolution.  
518 *Bioinformatics* **34**, 4121-4123 (2018).
- 519 19. T. Koyama, D. Platt, L. Parida, Variant analysis of SARS-CoV-2 genomes. *Bull World*  
520 *Health Organ* **98**, 495-504 (2020).
- 521 20. E. C. Rouchka, J. H. Chariker, D. Chung, Variant analysis of 1,040 SARS-CoV-2  
522 genomes. *PLoS One* **15**, e0241535 (2020).
- 523 21. K. M. Bindayna, S. Crinion, Variant analysis of SARS-CoV-2 genomes in the Middle  
524 East. *Microb Pathog* **153**, 104741 (2021).

- 525 22. D. M. Studdert, M. A. Hall, M. M. Mello, Partitioning the Curve - Interstate Travel  
526 Restrictions During the Covid-19 Pandemic. *N Engl J Med* **383**, e83 (2020).
- 527 23. P. Arora, S. Pohlmann, M. Hoffmann, Mutation D614G increases SARS-CoV-2  
528 transmission. *Signal Transduct Target Ther* **6**, 101 (2021).
- 529 24. B. Korber, W. M. Fischer, S. Gnanakaran, H. Yoon, J. Theiler, W. Abfalterer, N.  
530 Hengartner, E. E. Giorgi, T. Bhattacharya, B. Foley, K. M. Hastie, M. D. Parker, D. G.  
531 Partridge, C. M. Evans, T. M. Freeman, T. I. de Silva, C. McDanal, L. G. Perez, H. L.  
532 Tang, A. Moon-Walker, S. P. Whelan, C. C. LaBranche, E. O. Saphire, D. C. Montefiori,  
533 S. C.-G. Grp, Tracking Changes in SARS-CoV-2 Spike: Evidence that D614G Increases  
534 Infectivity of the COVID-19 Virus. *Cell* **182**, 812-+ (2020).
- 535 25. L. Z. Zhang, C. B. Jackson, H. H. Mou, A. Ojha, H. Y. Peng, B. D. Quinlan, E. S.  
536 Rangarajan, A. D. Pan, A. Vanderheiden, M. S. Suthar, W. H. Li, T. Izard, C. Rader, M.  
537 Farzan, H. Choe, SARS-CoV-2 spike-protein D614G mutation increases virion spike  
538 density and infectivity. *Nature Communications* **11**, (2020).
- 539 26. Z. Ke, J. Oton, K. Qu, M. Cortese, V. Zila, L. McKeane, T. Nakane, J. Zivanov, C. J.  
540 Neufeldt, B. Cerikan, J. M. Lu, J. Peukes, X. Xiong, H. G. Krausslich, S. H. W. Scheres,  
541 R. Bartenschlager, J. A. G. Briggs, Structures and distributions of SARS-CoV-2 spike  
542 proteins on intact virions. *Nature* **588**, 498-502 (2020).
- 543 27. J. Zhang, Y. Cai, T. Xiao, J. Lu, H. Peng, S. M. Sterling, R. M. Walsh, Jr., S. Rits-  
544 Volloch, H. Zhu, A. N. Woosley, W. Yang, P. Sliz, B. Chen, Structural impact on SARS-  
545 CoV-2 spike protein by D614G substitution. *Science*, (2021).

- 546 28. H. Liu, Q. Zhang, P. Wei, Z. Chen, K. Aviszus, J. Yang, W. Downing, C. Jiang, B.  
547 Liang, L. Reynoso, G. P. Downey, S. K. Frankel, J. Kappler, P. Marrack, G. Zhang, The  
548 basis of a more contagious 501Y.V1 variant of SARS-CoV-2. *Cell Res*, (2021).
- 549 29. M. McCallum, J. Bassi, A. Marco, A. Chen, A. C. Walls, J. D. Iulio, M. A. Tortorici, M.  
550 J. Navarro, C. Silacci-Fregni, C. Saliba, M. Agostini, D. Pinto, K. Culap, S. Bianchi, S.  
551 Jaconi, E. Cameroni, J. E. Bowen, S. W. Tilles, M. S. Pizzuto, S. B. Guastalla, G. Bona,  
552 A. F. Pellanda, C. Garzoni, W. C. Van Voorhis, L. E. Rosen, G. Snell, A. Telenti, H. W.  
553 Virgin, L. Piccoli, D. Corti, D. Veessler, SARS-CoV-2 immune evasion by variant  
554 B.1.427/B.1.429. *bioRxiv*, (2021).
- 555 30. M. Rolland, P. B. Gilbert, Sieve analysis to understand how SARS-CoV-2 diversity can  
556 impact vaccine protection. *PLoS Pathogens* (*in press*), (2021).
- 557 31. D. Follmann, J. Fintzi, M. P. Fay, H. E. Janes, L. R. Baden, H. M. El Sahly, T. R.  
558 Fleming, D. V. Mehrotra, L. N. Carpp, M. Juraska, D. Benkeser, D. Donnell, Y. Fong, S.  
559 Han, I. Hirsch, Y. Huang, Y. Huang, O. Hyrien, A. Luedtke, M. Carone, M. Nason, A.  
560 Vandebosch, H. Zhou, I. Cho, E. Gabriel, J. G. Kublin, M. S. Cohen, L. Corey, P. B.  
561 Gilbert, K. M. Neuzil, A Deferred-Vaccination Design to Assess Durability of COVID-  
562 19 Vaccine Effect After the Placebo Group Is Vaccinated. *Ann Intern Med*, (2021).
- 563 32. A. Addetia, K. H. D. Crawford, A. Dingens, H. Zhu, P. Roychoudhury, M. L. Huang, K.  
564 R. Jerome, J. D. Bloom, A. L. Greninger, Neutralizing Antibodies Correlate with  
565 Protection from SARS-CoV-2 in Humans during a Fishery Vessel Outbreak with a High  
566 Attack Rate. *J Clin Microbiol* **58**, (2020).
- 567 33. A. G. Letizia, Y. Ge, S. Vangeti, C. Goforth, D. L. Weir, N. A. Kuzmina, C. A. Balinsky,  
568 H. W. Chen, D. Ewing, A. Soares-Schanoski, M. C. George, W. D. Graham, F. Jones, P.

- 569 Bharaj, R. A. Lizewski, S. E. Lizewski, J. Marayag, N. Marjanovic, C. M. Miller, S.  
570 Mofsowitz, V. D. Nair, E. Nunez, D. M. Parent, C. K. Porter, E. Santa Ana, M. Schilling,  
571 D. Stadlbauer, V. A. Sugiharto, M. Termini, P. Sun, R. P. Tracy, F. Krammer, A.  
572 Bukreyev, I. Ramos, S. C. Sealfon, SARS-CoV-2 seropositivity and subsequent infection  
573 risk in healthy young adults: a prospective cohort study. *Lancet Respir Med*, (2021).
- 574 34. K. A. Earle, D. M. Ambrosino, A. Fiore-Gartland, D. Goldblatt, P. B. Gilbert, G. R.  
575 Siber, P. Dull, S. A. Plotkin, Evidence for antibody as a protective correlate for COVID-  
576 19 vaccines. <https://doi.org/10.1101/2021.03.17.20200246> Posted 20 Mar, 2021. Access  
577 date 28 Apr, 2021. *medRxiv*, 2021.2003.2017.20200246 (2021).
- 578 35. K. McMahan, J. Yu, N. B. Mercado, C. Loos, L. H. Tostanoski, A. Chandrashekar, J.  
579 Liu, L. Peter, C. Atyeo, A. Zhu, E. A. Bondzie, G. Dagotto, M. S. Gebre, C. Jacob-Dolan,  
580 Z. Li, F. Nampanya, S. Patel, L. Pessaint, A. Van Ry, K. Blade, J. Yalley-Ogunro, M.  
581 Cabus, R. Brown, A. Cook, E. Teow, H. Andersen, M. G. Lewis, D. A. Lauffenburger, G.  
582 Alter, D. H. Barouch, Correlates of protection against SARS-CoV-2 in rhesus macaques.  
583 *Nature* **590**, 630-634 (2021).
- 584 36. D. Zhou, W. Dejnirattisai, P. Supasa, C. Liu, A. J. Mentzer, H. M. Ginn, Y. Zhao, H. M.  
585 E. Duyvesteyn, A. Tuekprakhon, R. Nutalai, B. Wang, G. C. Paesen, C. Lopez-Camacho,  
586 J. Slon-Campos, B. Hallis, N. Coombes, K. Bewley, S. Charlton, T. S. Walter, D. Skelly,  
587 S. F. Lumley, C. Dold, R. Levin, T. Dong, A. J. Pollard, J. C. Knight, D. Crook, T.  
588 Lambe, E. Clutterbuck, S. Bibi, A. Flaxman, M. Bittaye, S. Belij-Rammerstorfer, S.  
589 Gilbert, W. James, M. W. Carroll, P. Klenerman, E. Barnes, S. J. Dunachie, E. E. Fry, J.  
590 Mongkolsapaya, J. Ren, D. I. Stuart, G. R. Screaton, Evidence of escape of SARS-CoV-2

- 591 variant B.1.351 from natural and vaccine-induced sera. *Cell* **184**, 2348-2361 e2346  
592 (2021).
- 593 37. R. E. Chen, X. Zhang, J. B. Case, E. S. Winkler, Y. Liu, L. A. VanBlargan, J. Liu, J. M.  
594 Errico, X. Xie, N. Suryadevara, P. Gilchuk, S. J. Zost, S. Tahan, L. Droit, J. S. Turner,  
595 W. Kim, A. J. Schmitz, M. Thapa, D. Wang, A. C. M. Boon, R. M. Presti, J. A.  
596 O'Halloran, A. H. J. Kim, P. Deepak, D. Pinto, D. H. Fremont, J. E. Crowe, Jr., D. Corti,  
597 H. W. Virgin, A. H. Ellebedy, P. Y. Shi, M. S. Diamond, Resistance of SARS-CoV-2  
598 variants to neutralization by monoclonal and serum-derived polyclonal antibodies. *Nat*  
599 *Med* **27**, 717-726 (2021).
- 600 38. Y. L. Shu, J. McCauley, GISAID: Global initiative on sharing all influenza data - from  
601 vision to reality. *Eurosurveillance* **22**, 2-4 (2017).
- 602 39. C. Wang, Z. Liu, Z. Chen, X. Huang, M. Xu, T. He, Z. Zhang, The establishment of  
603 reference sequence for SARS-CoV-2 and variation analysis. *J Med Virol* **92**, 667-674  
604 (2020).
- 605 40. T. Nakamura, K. D. Yamada, K. Tomii, K. Katoh, Parallelization of MAFFT for large-  
606 scale multiple sequence alignments. *Bioinformatics* **34**, 2490-2492 (2018).
- 607 41. F. Murtagh, P. Legendre, Ward's Hierarchical Agglomerative Clustering Method: Which  
608 Algorithms Implement Ward's Criterion? *J Classif* **31**, 274-295 (2014).
- 609 42. T. J. Hastie, *Generalized additive models*. New York: Chapman and Hall, 1990.  
610 (Chapman and Hall, New York, 1990).
- 611 43. J. D. Storey, J. E. Taylor, D. Siegmund, Strong control, conservative point estimation and  
612 simultaneous conservative consistency of false discovery rates: a unified approach. *J R*  
613 *Stat Soc B* **66**, 187-205 (2004).

- 614 44. S. N. Wood, N. Pya, B. Safken, Smoothing Parameter and Model Selection for General  
615 Smooth Models. *J Am Stat Assoc* **111**, 1548-1563 (2016).
- 616 45. P. Scheet, M. Stephens, A fast and flexible statistical model for large-scale population  
617 genotype data: applications to inferring missing genotypes and haplotypic phase. *Am J*  
618 *Hum Genet* **78**, 629-644 (2006).
- 619 46. T. D. Goddard, C. C. Huang, E. C. Meng, E. F. Pettersen, G. S. Couch, J. H. Morris, T. E.  
620 Ferrin, UCSF ChimeraX: Meeting modern challenges in visualization and analysis.  
621 *Protein Sci* **27**, 14-25 (2018).
- 622 47. M. V. Shapovalov, R. L. Dunbrack, Jr., A smoothed backbone-dependent rotamer library  
623 for proteins derived from adaptive kernel density estimates and regressions. *Structure* **19**,  
624 844-858 (2011).
- 625 48. J. Lan, J. Ge, J. Yu, S. Shan, H. Zhou, S. Fan, Q. Zhang, X. Shi, Q. Wang, L. Zhang, X.  
626 Wang, Structure of the SARS-CoV-2 spike receptor-binding domain bound to the ACE2  
627 receptor. *Nature* **581**, 215-220 (2020).

628

629 **Acknowledgments:**

630 **Funding:**

631 This study was supported by the National Institutes of Health/National Institute of Allergy and  
632 Infectious Diseases (<https://www.niaid.nih.gov/>) through award UM1 AI068635 to PBG.  
633 The funders had no role in study design, data collection and analysis, decision to publish,  
634 or preparation of the manuscript.

635 **Author contributions:**

636 Conceptualization: LPZ, TL, PBG, TRH, JTS, LS, THP, DEG, KRJ



637           Methodology: LPZ  
638           Investigation: LPZ, TRH, JTS, LS, THP, DEG, KRJ  
639           Visualization: LPZ  
640           Funding acquisition: LPZ, PBG  
641           Formal analysis: LPZ, TL  
642           Data curation: JTS  
643           Supervision: LPZ, PBG  
644           Writing – original draft: LPZ, TL, PBG, JTS, LNC  
645           Writing – review & editing: LPZ, PBG, TRH, JTS, LS, THP, LNC, DEG, KRJ  
646    **Competing interests:** The authors declare that they have no competing interests.  
647    **Data and materials availability:** All sequence data analyzed here are publicly available at  
648           GSIAD (<https://www.gisaid.org/>).

650 **Table 1. For 15 amino acid positions shown to harbor a substitution in a VOI or VOC,**  
 651 **times estimated by the SLS method when the corresponding VRV had a locally averaged**  
 652 **proportion exceeding 10% (and, if applicable, subsequently decreased below 10%) based**  
 653 **on a state/territory-specific model. The top two rows show the first reported date in the**  
 654 **literature of a VOI or VOC harboring a substitution at the designated site vs the date of**  
 655 **VRV detection at the same amino acid position by the SLS method (across all**  
 656 **states/territories).**

|                                              | L5      | S13  | V70 | T95     | W152 | D253    | L452 | S477 | E484 | N501        | A570 | D614 | Q677     | P681     | A701 |
|----------------------------------------------|---------|------|-----|---------|------|---------|------|------|------|-------------|------|------|----------|----------|------|
| Reporting Day*                               | 301     | 301  | 301 | 301     | 301  | 87      | 301  | 331  | 87   | 362         | 362  | 362  | 362      | 362      | 362  |
| Earliest SLS Detection Day Across All States | 11      | 159  | 329 | 149     | 381  | 98      | 381  | 405  | 371  | 206         | 404  | 10   | 20       | 11       | 176  |
| Alabama                                      | 63-186  |      |     |         |      |         |      |      | 404- |             |      | 63-  | 253-305- |          |      |
| Alaska                                       |         |      |     |         |      |         |      |      |      |             |      | 56-  | 323-357- | 383-     |      |
| Arizona                                      |         |      |     |         |      |         |      |      |      |             |      | 26-  | 400      | 353-     |      |
| Arkansas                                     |         |      |     |         |      |         |      |      |      |             |      | 56-  | 329-     |          |      |
| California                                   |         | 398- |     |         | 402- |         | 390- |      |      |             |      | 45-  |          | 374-     |      |
| Colorado                                     | 286-    |      |     |         |      |         |      |      |      |             |      | 45-  | 286-     | 370-     |      |
| Connecticut                                  |         |      |     |         |      |         |      |      |      | 314-        |      | 43-  | 191-     | 378-     |      |
| DC                                           |         |      |     |         |      |         |      | 391- |      |             |      | 47-  |          | 344-     |      |
| Delaware                                     |         |      |     |         |      |         |      |      |      |             |      | 52-  | 384-     | 288-     |      |
| Florida                                      |         |      |     |         |      |         |      |      |      |             |      | 33-  | 368-     | 389-     |      |
| Georgia                                      |         |      |     |         |      |         |      |      |      |             |      | 41-  | 345-     | 407-     |      |
| Hawaii                                       | 175-190 |      |     |         |      |         |      |      |      |             |      | 46-  | 374-     | 174-376  |      |
| Idaho                                        |         |      |     |         |      |         |      |      |      |             |      | 53-  |          |          |      |
| Illinois                                     |         |      |     |         |      |         |      |      |      |             |      | 24-  | 366-     | 380-     |      |
| India                                        |         |      |     |         |      |         |      |      |      |             |      | 48-  | 370-273- | 383-     |      |
| Iowa                                         |         |      |     |         |      |         |      |      |      |             |      | 48-  | 388      |          |      |
| Kansas                                       |         |      |     |         |      | 260-291 |      |      |      |             |      | 47-  |          | 385-     |      |
| Kentucky                                     |         |      |     |         |      |         |      |      |      |             |      | 59-  | 389-397  |          |      |
| Louisiana                                    |         |      |     |         |      |         |      |      |      |             |      | 50-  | 307-     | 368-     |      |
| Maine                                        |         |      |     |         |      |         |      |      | 404- | 371-        |      | 51-  |          |          |      |
| Maryland                                     |         |      |     |         | 407- |         | 394- |      | 390- |             |      | 45-  |          | 230-     |      |
| Massachusetts                                |         |      |     |         |      |         |      |      |      | 206-264-273 |      | 10-  | 346-     | 298-     |      |
| Michigan                                     |         |      |     | 149-177 |      |         |      |      |      |             |      | 50-  | 361-     |          |      |
| Minnesota                                    | 186-294 |      |     |         |      |         |      |      |      |             |      | 46-  | 297-     | 387-     |      |
| Mississippi                                  | 144-215 |      |     |         |      |         |      |      |      |             |      | 42-  | 353-     | 392-364- |      |
| Missouri                                     |         |      |     |         |      |         |      |      |      |             |      | 47-  |          | 384      |      |
| Montana                                      |         |      |     |         |      |         |      |      |      |             |      | 68-  |          |          |      |
| Nebraska                                     |         |      |     |         |      |         |      |      |      |             |      | 46-  |          | 387-     |      |

|                |       |      |      |      |      |      |      |      |      |      |      |      |
|----------------|-------|------|------|------|------|------|------|------|------|------|------|------|
| Nevada         | 392-  |      | 396- |      | 393- |      |      |      | 37-  | 391- | 394- |      |
| New Hampshire  |       |      |      |      |      |      | 374- |      | 41-  | 349- | 364- |      |
| New Jersey     |       |      |      |      | 402- |      |      |      | 44-  |      | 276- |      |
| New Mexico     |       |      |      |      |      |      |      |      | 50-  | 291- | 387- | 233- |
| New York       | 11-13 |      |      |      | 386- | 414- |      |      | 11-  |      | 11-  | 252  |
| North Carolina |       |      |      |      |      |      |      |      | 44-  |      | 382- |      |
| North Dakota   |       |      |      |      |      |      |      |      | 57-  | 328- |      |      |
| Ohio           |       |      |      |      | 405- |      |      |      | 20-  | 20-  | 391- |      |
| Oklahoma       |       |      |      |      |      |      |      |      | 54-  | 306- |      |      |
| Oregon         | 397-  |      |      |      | 398- |      |      |      | 45-  |      |      |      |
| Pennsylvania   |       |      |      |      |      |      |      |      | 44-  | 394- | 317- |      |
| Puerto Rico    |       |      |      | 185- |      |      |      |      | 49-  |      | 347- |      |
| Rhode Island   |       |      |      | 252  |      |      | 371- |      | 40-  | 358- | 379- |      |
| South Carolina |       |      |      |      |      |      | 405- | 384  | 356- | 398  | 368- |      |
| Tennessee      | 50-   |      |      |      |      |      |      |      | 46-  | 405- | 389  |      |
| Texas          | 141   |      |      |      |      |      |      |      | 50-  | 318- |      |      |
| Texas          |       |      |      |      |      |      |      |      | 23-  | 360- | 378- |      |
| Utah           | 159-  |      |      | 98-  |      |      |      |      | 44-  |      | 358- |      |
| Utah           | 173   |      |      | 190  |      |      |      |      |      |      |      |      |
| Virginia       |       | 329- |      |      |      |      |      |      | 47-  | 384- | 359- | 176- |
| Virginia       |       | 331  |      |      |      |      | 397- |      |      |      |      | 185  |
| Washington     | 406-  |      | 411- |      | 403- |      |      |      | 50-  | 373- |      |      |
| Washington     |       |      |      |      |      |      |      |      |      | 299- |      |      |
| Wisconsin      |       |      |      |      | 409- |      |      | 410- | 12-  | 407  | 411- |      |
| Wisconsin      |       |      |      |      |      |      |      | 265- |      |      |      |      |
| Wyoming        | 381-  |      | 381- |      | 381- |      |      | 271  |      |      |      |      |
| Wyoming        |       |      |      |      |      |      |      |      | 51-  |      | 392- |      |
| Other States   |       |      |      |      |      |      | 393- | 404- | 404- | 34-  | 368- | 375- |
| Other States   |       |      |      |      |      |      |      |      |      |      |      | 381  |

657

658

659 **“Reporting Day” was set to the 15<sup>th</sup> day in each month in which the relevant publication appeared.**

660 **“SLS Detection Day” was set to the day at which the locally averaged proportion of the specific VRV exceeded 10% based**  
 661 **on temporality models fitted in each states/territory. If the locally averaged proportion of the VRV later declined below**  
 662 **10%, the second day is shown after a hyphen.**

663 **All numbers in the table express the number of days post-January 19, 2021.**

664 **VOI, variant of interest; VOC, variant of concern.**

666

667 **Table 2. VRV-haplotypes identified in Washington and in New York: state-specific**  
 668 **frequencies of cases, number of VRVs per VRV-haplotype, and haplotypic polymorphisms**  
 669 **(state-specific frequencies).** Unimutable residues are denoted with an “X”.

670

| ID                | VRV-haplotype                             | Freq  | L | Haplotypic polymorphisms (frequency)                                                                                                                                                                                                     |
|-------------------|-------------------------------------------|-------|---|------------------------------------------------------------------------------------------------------------------------------------------------------------------------------------------------------------------------------------------|
| <b>Washington</b> |                                           |       |   |                                                                                                                                                                                                                                          |
| <b>W1</b>         | S13-W152-L452-V483-N501-D614-A684         | 104   | 4 | ICRVNGA-4(20)/IWRVNGA-3(4)/SCRVNGA-3(5)/SLLVNGA-2(5)/SRLVNGA-2(4)/SWLVTGA-2(4)/SWLVYDA-1(1)/SWLVYGA-2(5)/SWQVNGA-2(2)/SWRVNGA-2(54)                                                                                                      |
| <b>W2</b>         | D614-Q677-T732                            | 12    | 3 | GHS-3(11)/XXX-3(1)                                                                                                                                                                                                                       |
| <b>W3</b>         | D614-T732                                 | 128   | 2 | GA-2(126)/GI-2(2)                                                                                                                                                                                                                        |
| <b>W4</b>         | D614-Q677                                 | 208   | 2 | DH-1(9)/GH-2(110)/GP-2(89)                                                                                                                                                                                                               |
| <b>W5</b>         | D178-D614                                 | 74    | 2 | GG-2(70)/NG-2(4)                                                                                                                                                                                                                         |
| <b>W6</b>         | D614                                      | 7130  | 1 | G-1(7125)/N-1(5)                                                                                                                                                                                                                         |
| <b>New York</b>   |                                           |       |   |                                                                                                                                                                                                                                          |
| <b>N1</b>         | L5-L54-E132-Y453-T478-E484-D614-P681-T732 | 172   | 9 | LLEYKEGHA-4(168)/LLEYKEGHT-3(4)                                                                                                                                                                                                          |
| <b>N2</b>         | L5-L54-E132-Y453-T478-E484-D614-T732      | 651   | 8 | FLEYREGT-3(4)/FLEYTEDT-1(11)/FLEYTEGA-3(3)/FLEYTEGS-3(1)/FLEYTEGT-2(266)/FLEYTKGA-4(1)/FLEYTKGT-3(44)/LLEYKEGT-2(3)/LLEYTAGT-2(1)/LLEYTEGA-2(51)/LLEYTEGI-2(2)/LLEYTEGS-2(24)/LLEYTKGS-3(2)/LLEYTKGT-2(171)/LLEYTQGT-2(8)/LLQYTEGT-2(59) |
| <b>N3</b>         | D80-F157-L452-D614-P681-T859-D950         | 132   | 7 | DFLGHID-3(108)/DFLGPID-2(18)/DFLGPNH-3(4)/DSLGPNH-4(2)                                                                                                                                                                                   |
| <b>N4</b>         | D80-F157-L452-D614-T859-D950              | 637   | 6 | DFQGND-3(4)/DFRGID-3(15)/DFRGNH-4(1)/DFRGTD-2(120)/DFRNTD-2(2)/DSRGNH-5(3)/DSRGTD-3(2)/GFRGND-4(1)/GFRGNH-5(1)/GSLGNH-5(9)/GSRGND-5(10)/GSRGNH-6(455)/GSRGNY-6(1)/GSRGTD-4(13)                                                           |
| <b>N5</b>         | S494-D614-P681-T716                       | 514   | 4 | PGHI-4(367)/PGHT-3(55)/PGPT-2(52)/SGHI-3(19)/SGHT-2(8)/SGPI-2(13)                                                                                                                                                                        |
| <b>N6</b>         | D614-P681                                 | 1161  | 2 | GH-2(1124)/GL-2(4)/GR-2(32)/GS-2(1)                                                                                                                                                                                                      |
| <b>N7</b>         | D614                                      | 10822 | 1 | D-0(1)/G-1(10821)                                                                                                                                                                                                                        |

671

672 **Table 3. VRV-haplotypes.** Cross-tabulation of individual VRV-haplotypes with GISAID-  
 673 assigned lineages in all 167,893 sequences, excluding lineages with fewer than 10 occurrences.  
 674 “Freq”, corresponding haplotype frequencies; “Unknown”, sequences not assigned to any  
 675 lineage.

| Hap-Load                               | Freq | Unknown | A.2.4 | B.1 | B.1.1 | B.1.1.1 | B.1.1.171 | B.1.1.222 | B.1.1.29 | B.1.1.304 | B.1.1.317 | B.1.152 | B.1.165 | B.1.166 | B.1.2 | B.1.215 | B.1.234 | B.1.256 | B.1.324 | B.1.350 | B.1.354 | B.1.360 | B.1.399 | B.1.94 |  |
|----------------------------------------|------|---------|-------|-----|-------|---------|-----------|-----------|----------|-----------|-----------|---------|---------|---------|-------|---------|---------|---------|---------|---------|---------|---------|---------|--------|--|
| <b>1) D80-F157-L452-D614-T859-D950</b> |      |         |       |     |       |         |           |           |          |           |           |         |         |         |       |         |         |         |         |         |         |         |         |        |  |
| DSRGNH-5                               | 63   |         |       | 58  |       |         |           |           |          |           |           | 5       |         |         |       |         |         |         |         |         |         |         |         |        |  |
| GSLGNH-5                               | 9    |         |       | 9   |       |         |           |           |          |           |           |         |         |         |       |         |         |         |         |         |         |         |         |        |  |
| GSRGND-5                               | 21   |         |       | 19  |       |         |           |           |          |           |           |         |         |         |       |         |         |         |         |         |         |         |         | 1      |  |
| GSRGNH-6                               | 539  |         |       | 522 |       |         |           |           | 1        |           |           | 2       |         | 3       |       |         |         |         |         |         |         |         |         | 5      |  |
| <b>2) D80-S155-F157-L452-T859-D950</b> |      |         |       |     |       |         |           |           |          |           |           |         |         |         |       |         |         |         |         |         |         |         |         |        |  |
| DRSRNH-5                               | 39   |         |       | 39  |       |         |           |           |          |           |           |         |         |         |       |         |         |         |         |         |         |         |         |        |  |
| GRSRND-5                               | 3    |         |       | 3   |       |         |           |           |          |           |           |         |         |         |       |         |         |         |         |         |         |         |         |        |  |
| GRSRNH-6                               | 30   |         |       | 30  |       |         |           |           |          |           |           |         |         |         |       |         |         |         |         |         |         |         |         |        |  |
| GSSRNH-5                               | 509  |         |       | 492 |       |         |           |           | 1        |           |           | 2       |         | 3       |       |         |         |         |         |         |         |         |         | 5      |  |
| <b>3) G142-E180-D614-Q677-S940</b>     |      |         |       |     |       |         |           |           |          |           |           |         |         |         |       |         |         |         |         |         |         |         |         |        |  |
| SEGHF-4                                | 3    |         |       |     |       |         |           |           |          |           |           |         |         |         | 1     |         | 1       |         |         | 1       |         |         |         |        |  |
| SVGHF-5                                | 353  |         |       |     |       |         |           |           |          |           |           |         |         |         |       |         | 353     |         |         |         |         |         |         |        |  |
| SVGHS-4                                | 273  | 2       |       | 1   |       |         |           |           |          |           |           |         |         |         |       |         | 262     |         |         | 8       |         |         |         |        |  |
| <b>4) S155-F157-L452-T859-D950</b>     |      |         |       |     |       |         |           |           |          |           |           |         |         |         |       |         |         |         |         |         |         |         |         |        |  |
| RSRND-4                                | 3    |         |       | 3   |       |         |           |           |          |           |           |         |         |         |       |         |         |         |         |         |         |         |         |        |  |
| RSRNH-5                                | 69   |         |       | 69  |       |         |           |           |          |           |           |         |         |         |       |         |         |         |         |         |         |         |         |        |  |
| SSRNH-4                                | 533  |         |       | 511 |       |         |           |           | 1        |           |           | 7       |         | 3       |       |         |         |         |         |         |         |         |         | 5      |  |
| <b>5) S13-W152-L452-D614</b>           |      |         |       |     |       |         |           |           |          |           |           |         |         |         |       |         |         |         |         |         |         |         |         |        |  |
| ICLG-3                                 | 43   | 1       |       | 36  |       |         |           |           |          |           |           |         |         |         | 3     |         |         |         |         |         |         |         |         |        |  |
| ICRG-4                                 | 795  | 51      |       | 557 |       |         |           |           |          |           |           |         | 1       | 4       | 10    |         | 14      |         |         | 10      | 34      | 2       | 72      |        |  |
| IWRG-3                                 | 120  | 1       |       | 77  |       |         |           |           |          |           |           |         |         |         | 7     |         |         |         |         |         | 2       |         | 28      |        |  |
| SCRG-3                                 | 30   | 4       |       | 16  |       |         |           |           |          |           |           |         |         |         | 4     |         |         |         |         |         |         |         |         |        |  |
| <b>6) S494-D614-P681-T716</b>          |      |         |       |     |       |         |           |           |          |           |           |         |         |         |       |         |         |         |         |         |         |         |         |        |  |
| PGHI-4                                 | 521  |         |       | 467 | 1     |         |           |           |          |           |           |         |         | 1       | 1     | 20      |         |         |         | 3       |         |         |         |        |  |
| PGHT-3                                 | 194  |         |       | 100 | 8     |         | 3         |           |          |           |           |         | 31      |         | 2     | 3       |         | 29      |         |         |         |         |         | 1      |  |
| RGHI-4                                 | 3    |         |       |     |       |         |           |           |          |           |           |         |         |         |       | 3       |         |         |         |         |         |         |         |        |  |
| SGHI-3                                 | 38   |         |       | 19  | 3     |         | 1         |           |          |           |           |         |         |         | 4     |         |         |         |         |         |         |         |         |        |  |
| <b>7) T478-D614-P681-T732</b>          |      |         |       |     |       |         |           |           |          |           |           |         |         |         |       |         |         |         |         |         |         |         |         |        |  |
| KGHA-4                                 | 2132 | 11      |       | 17  | 2     |         | 14        | 2029      | 18       | 1         | 12        |         |         |         | 2     |         |         |         |         |         |         |         |         |        |  |
| KGHS-4                                 | 6    |         |       |     |       |         |           |           |          |           |           |         |         |         |       |         |         |         |         |         |         |         |         |        |  |
| KGHT-3                                 | 159  |         |       | 4   | 57    |         | 3         |           | 67       | 8         |           |         |         |         |       |         |         |         |         |         |         |         |         | 1      |  |
| KGPA-3                                 | 5    |         |       | 1   |       |         |           | 3         | 1        |           |           |         |         |         |       |         |         |         |         |         |         |         |         |        |  |
| TGHA-3                                 | 85   |         |       | 13  |       |         |           | 63        | 2        | 1         | 2         |         |         |         | 2     |         |         |         |         |         |         |         |         |        |  |
| <b>8) F157-L452-D614-T859</b>          |      |         |       |     |       |         |           |           |          |           |           |         |         |         |       |         |         |         |         |         |         |         |         |        |  |
